# Supplementary material for: 3D reactive inkjet printing of polydimethylsiloxane
Source: Royal Society of Chemistry journal article supplement (doi:10.1039/c7tc02412f), 2017-01-01
Supplement: c7tc02412f1.pdf [file c7tc02412f1.pdf]

## Supplementary Information

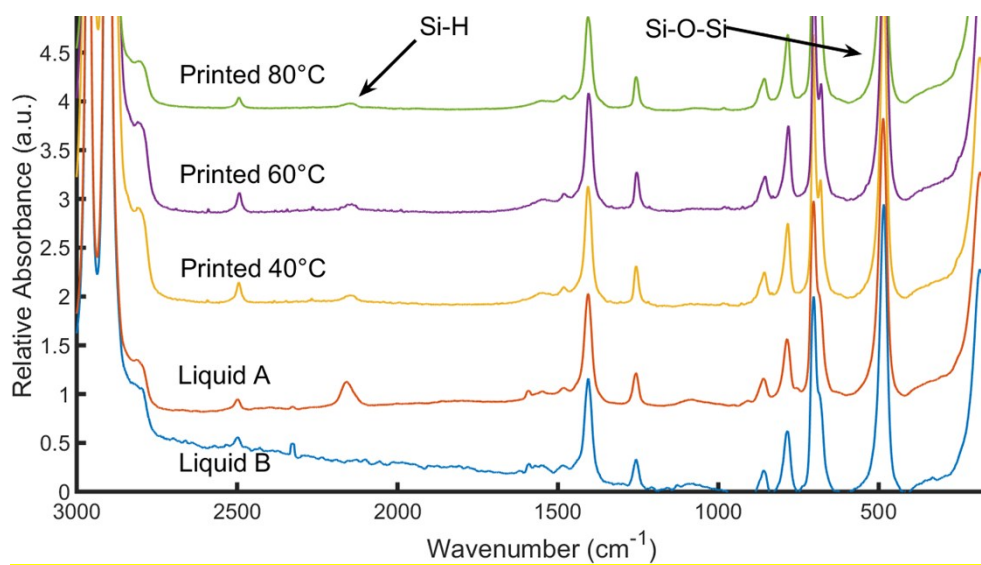

Supplementary 1 - Supplementary Information - Representative FTIR spectra for PDMS A, B and printed samples.
